# Supplementary material for: Upregulated integrin α11 in the stroma of cutaneous squamous cell carcinoma promotes skin carcinogenesis
Source: PubMed Central journal article supplement (PMC9393502; doi:10.3389/fonc.2022.981009), 2022-08-08
Supplement: DataSheet_1.pdf [file DataSheet_1.pdf]

## Supplementary Materials

**Supplementary Table 1.** Primary antibodies used for immunofluorescence staining of mouse tissues

| Antibody                        | Manufacturer      | Reference                  | Dilution |
|---------------------------------|-------------------|----------------------------|----------|
| anti-human integrin $\alpha 11$ | In house          | Smeland et al. 2020        | 1:1000   |
| anti-mouse integrin $\alpha 11$ | In house          | Velling <i>et al.</i> 1999 | 1:200    |
| anti-BrdU                       | Sigma-Aldrich     | B2531                      | 1:200    |
| anti-cytokeratin 5 (CK5)        | Covance           | PRB-160P                   | 1:100    |
| anti- $\alpha$ SMA-Cy3          | Sigma-Aldrich     | C6198                      | 1:200    |
| anti-NG2                        | Sigma-Aldrich     | AB5320                     | 1:50     |
| anti-Ki67                       | Dako              | M7249                      | 1:25     |
| anti-LOX                        | Novus Biologicals | NB100-2527                 | 1:500    |
| anti-PDGFR $\beta$ (CD140b)     | Thermo Fischer    | 14-1402-82                 | 1:50     |

**Supplementary Table 2.** Antibodies used for fluorescence-activated cell sorting (FACS)

| Antibody                                    | Manufacturer   | Reference |
|---------------------------------------------|----------------|-----------|
| CD11b                                       | BD Biosciences | 553311    |
| Lineage cocktail (Lin) (APC)                | BD Biosciences | 558074    |
| Ly-6A/E (Sca-1)                             | BD Biosciences | 558162    |
| Ly-6C                                       | BD Biosciences | 553104    |
| Ly-6G                                       | BD Biosciences | 560601    |
| Mouse T Lymphocyte Subset Antibody Cocktail | BD Biosciences | 558391    |
| PDGFR $\alpha$                              | BD Biosciences | 562776    |

**Supplementary Table 3.** Primer sequences used in qRT-PCR

| Gene          | Forward primer (5' to 3') | Reverse primer (5' to 3') |
|---------------|---------------------------|---------------------------|
| <i>Acta2</i>  | GATCAAGATCATTGCCCT        | GTGCTAGAGGCAGAGCAGGGG     |
| <i>Pdgfra</i> | CTTCGGAAGAGAGTGCCATC      | CACCAGGTCCGAGGAATCTA      |
| <i>Pdgfrb</i> | GGAGATTCGCAGGAGGTCAC      | ATAGCGTGGCTTCTTCTGCC      |
| <i>Tnc</i>    | CAGTGGAGTACGAGCTGCAT      | TAAACTTGGTGGCGATGGTA      |
| <i>Tgfb1</i>  | GAGCCCGAAGCGGACTACTA      | TGGTTTTCTCATAGATGGCGTTG   |
| <i>Colla1</i> | TCCTGCCGATGTCGCTATC       | CAAGTTCCGGTGTGACTCGTG     |
| <i>Col3a1</i> | CCACGAGGTGACAAAGGTGA      | GCCAGGGAATCCTCGATGT       |
| <i>Loxl1</i>  | GAGTGCATATTGCGCTTCCC      | GGTTGCCGAAGTCACAGGT       |
| <i>Loxl2</i>  | CAGAGAAGACCTACAACCCCA     | AGTGCCCGTGCAGTTCATAG      |
| <i>Loxl3</i>  | TGTGACAGAATGCGCCTCTC      | ACCTCAATGACGTTGGAGTCT     |
| <i>Loxl4</i>  | GGACTATATCTTCCAGGTGGTTGT  | GCACCGTATCATGTTATTGGAGAA  |
| <i>P4ha1</i>  | AAAACCAAGGCTGAGGCGAGC     | GCCTGCCGTCTGTAAGCCAC      |
| <i>P4ha2</i>  | GACGCCGACTGGCCACC         | AGCTTCTTCTGCCTCCGGGGT     |
| <i>Gapdh</i>  | AACTTTGGCATTGTGGAAGG      | GGATGCAGGGATGATGTTCT      |

**Supplementary Data**

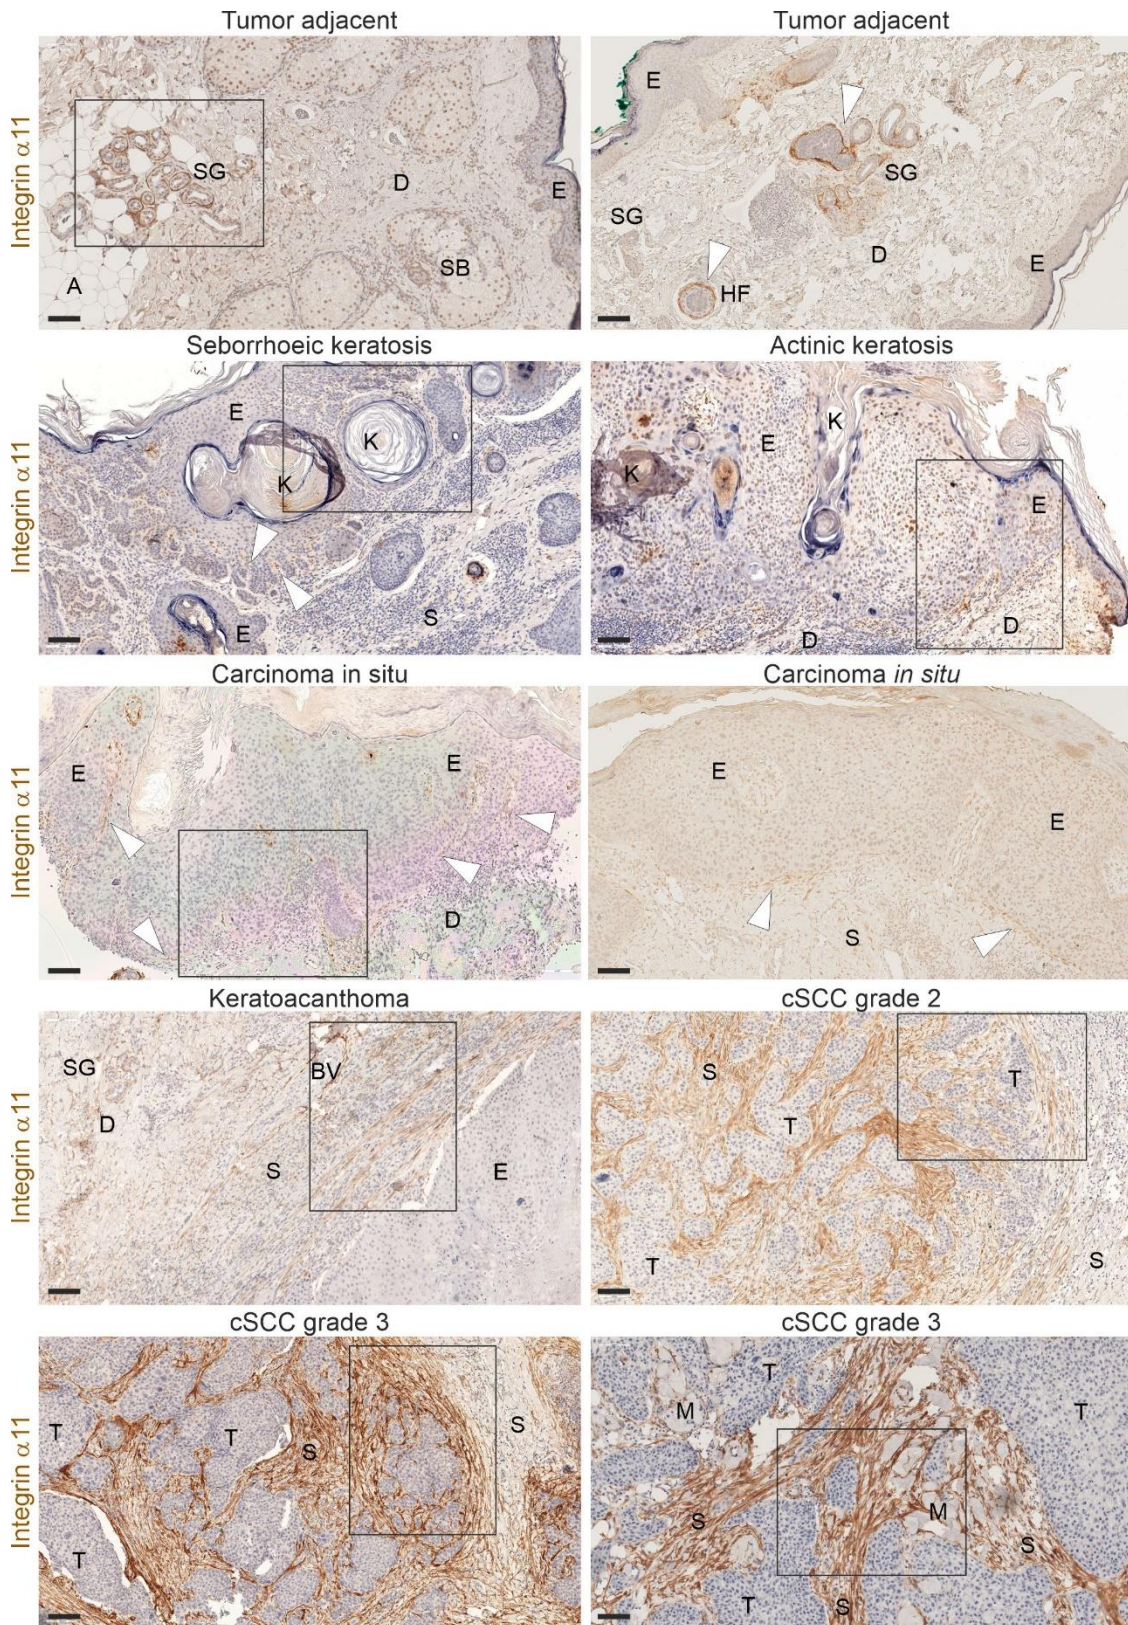

**Supplementary Figure 1. Expression and localization of integrin  $\alpha 11$  in human cutaneous lesions.**

Large images of immunohistochemical staining for integrin  $\alpha 11$  in tumor-adjacent normal skin, seborrhoeic keratosis, premalignant actinic keratosis, squamous carcinoma *in situ*, keratoacanthoma, and cutaneous squamous cells carcinomas (cSCC) of different grades. The areas presented in the main Figure 1 are indicated. Arrowhead marks  $\alpha 11$ -positive cells. Abbreviations: A, adipocyte; BV, blood vessel; D, dermis; E, epidermis; HF, hair follicle; K, keratin; M, muscle; S, stroma; SB, sebaceous gland; SG, salivary gland; T, tumor. Scale bars, 100  $\mu\text{m}$ .

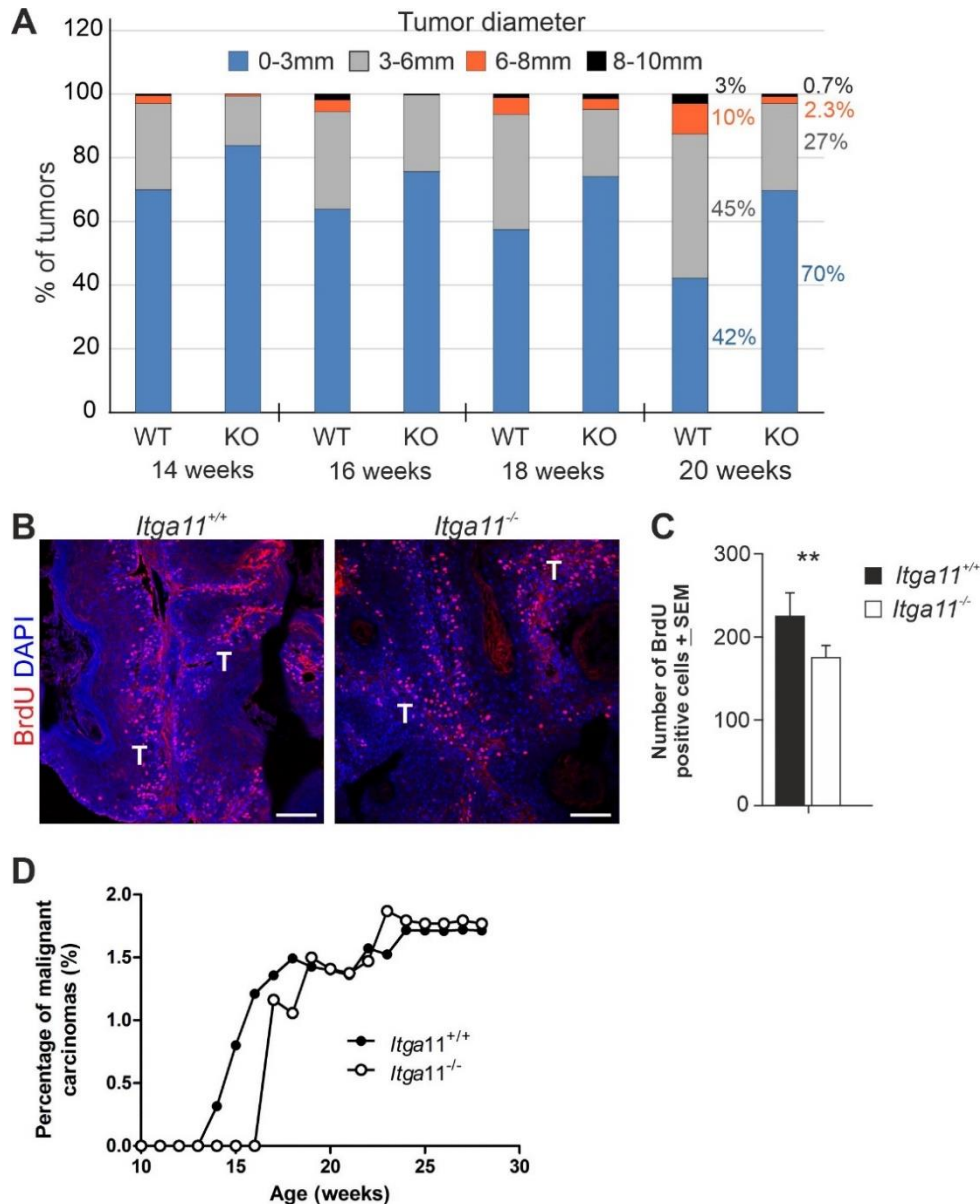

**Supplementary Figure 2. Integrin  $\alpha 11$  regulates skin tumorigenesis in the DMPA/TPA model.**

(A) Tumor size in the *Itga11*<sup>+/+</sup> (WT; n = 25) and *Itga11*<sup>-/-</sup> (knockout, KO; n = 21) mice. Skin tumors are stratified into four categories by tumor diameter. The proportion of tumors with a diameter over three mm is larger in the *Itga11*<sup>+/+</sup> mice at all time points. At week 20, for example, 70% of knockout tumors fall in the 0–3 mm group, and only 2.3% fall in the 6–8 mm group, whereas 42% of control tumors belong to the 0–3 mm group, and 10% belong to the 6–8 mm group. (B–C) Tumor cell proliferation. Proliferating cells were labelled with BrdU two hours before euthanasia and detected in tumor specimens with an anti-BrdU antibody. (B) Representative images of anti-BrdU staining of *Itga11*<sup>+/+</sup> and *Itga11*<sup>-/-</sup> papillomas. Scale, 100  $\mu$ m. T, tumor. (C) Quantification of BrdU-positive cells. Ten papillomas per genotype (from different mice) and 4–5 microscopic fields for each sample at a magnification of 200 $\times$  were counted. (D) Malignant conversion of benign papillomas to malignant cSCCs based on macroscopical scoring. The frequency of malignant conversion did not vary between genotypes.

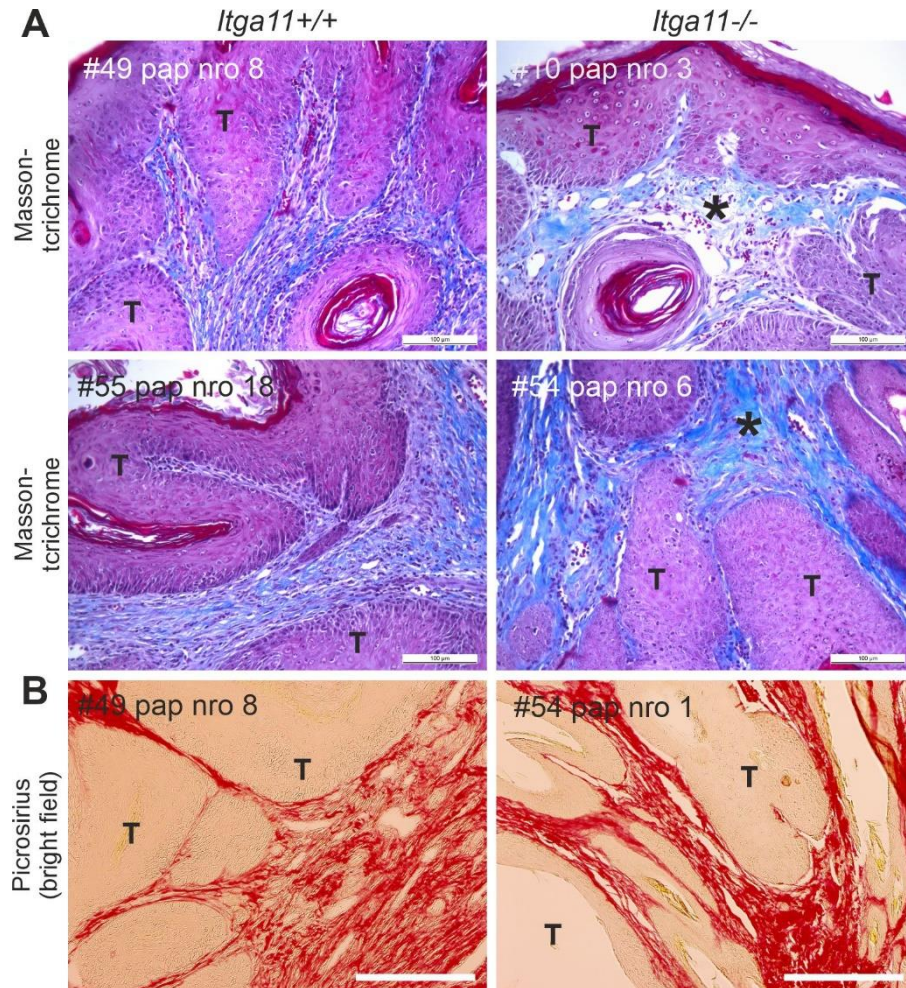

**Supplementary Figure 3. Stromal collagen *Itga11*<sup>+/+</sup> and *Itga11*<sup>-/-</sup> papillomas.** (A) Representative example images of Masson trichrome-stained papillomas from two *Itga11*<sup>+/+</sup> and two *Itga11*<sup>-/-</sup> mice. (B) Picrosirius red-stained papillomas imaged with bright field light microscopy. The same samples imaged under polarized light are shown in the main Figure, panel 4C. Scale bars, 100  $\mu$ m. T, tumor; asterisks in A, hyalinized collagen.

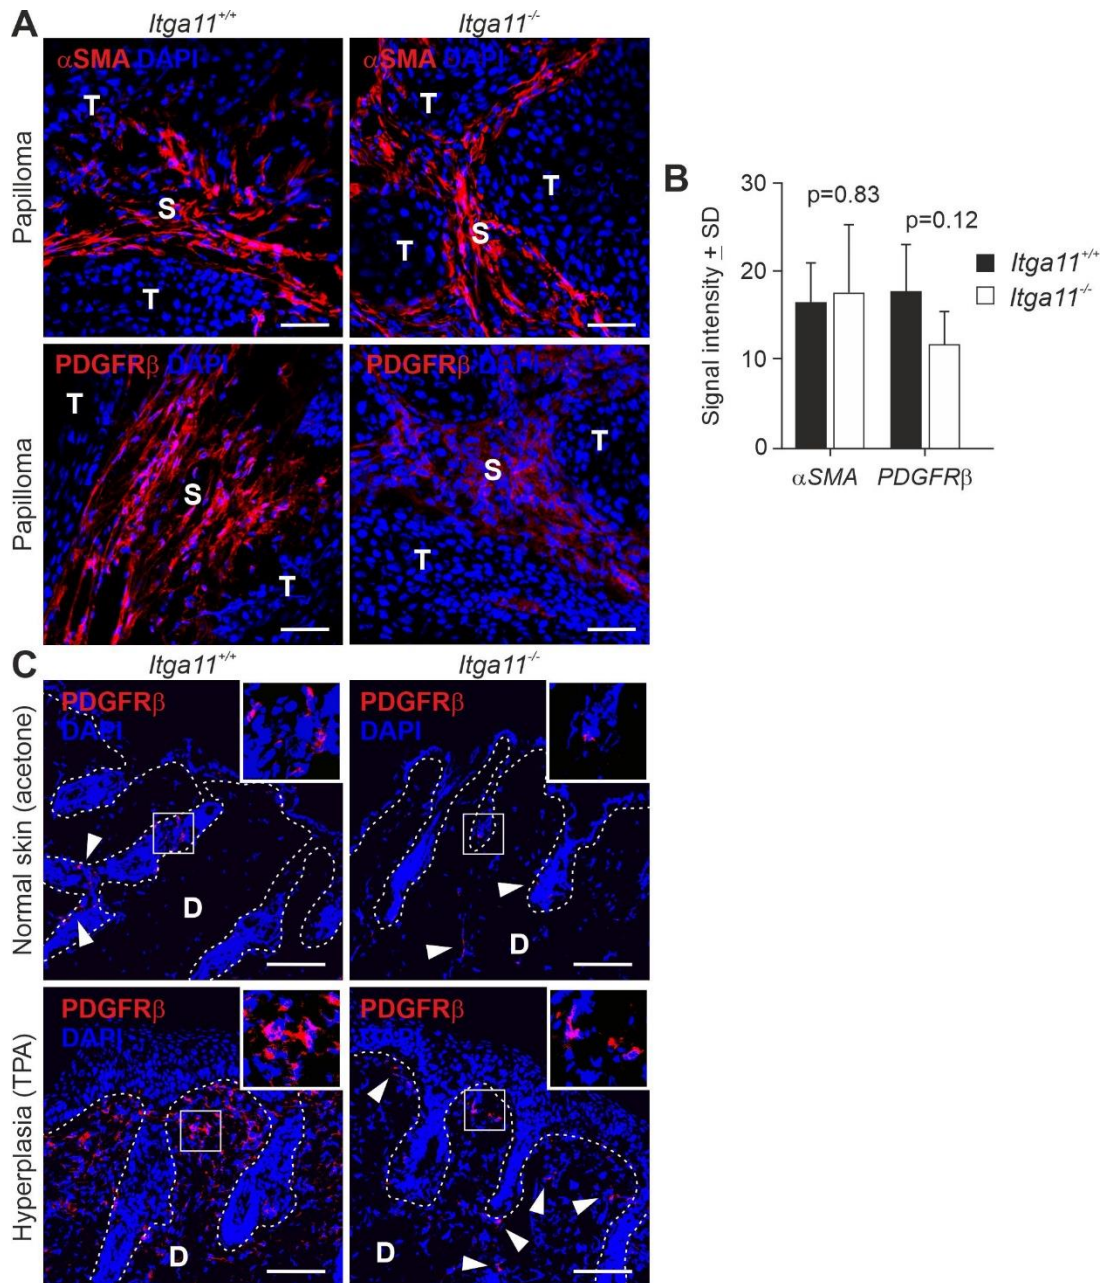

**Supplementary Figure 4. Immunofluorescence staining of CAF/myofibroblast markers in mouse papillomas and hyperplastic skin.** (A) Expression and localization of  $\alpha$ SMA and PDGFR $\beta$  in the stroma of papillomas. (B) Quantification of  $\alpha$ SMA and PDGFR $\beta$  immunofluorescence in *Itga11<sup>+/+</sup>* and *Itga11<sup>-/-</sup>* papillomas. Ten to 15 images from three (for  $\alpha$ SMA) and five (for PDGFR $\beta$ ) tumors per genotype (from different individuals) were quantified using Fiji ImageJ analysis software. p-values are shown in the image. (C) PDGFR $\beta$  staining of acetone-treated normal and TPA-treated hyperplastic skin specimens of the *Itga11<sup>+/+</sup>* and *Itga11<sup>-/-</sup>* mice. PDGFR $\beta$  is clearly induced in the *Itga11<sup>+/+</sup>* dermis upon TPA treatment but not in the *Itga11<sup>-/-</sup>* dermis. In both genotypes, PDGFR $\beta$  signals localize close to hair follicles in the healthy skin, whereas they localize mainly in dermal cells in the hyperplastic skin (arrowheads, inserts). In A and C, Scale bars, 100  $\mu$ m; D, dermis; S, stroma; T, tumor.

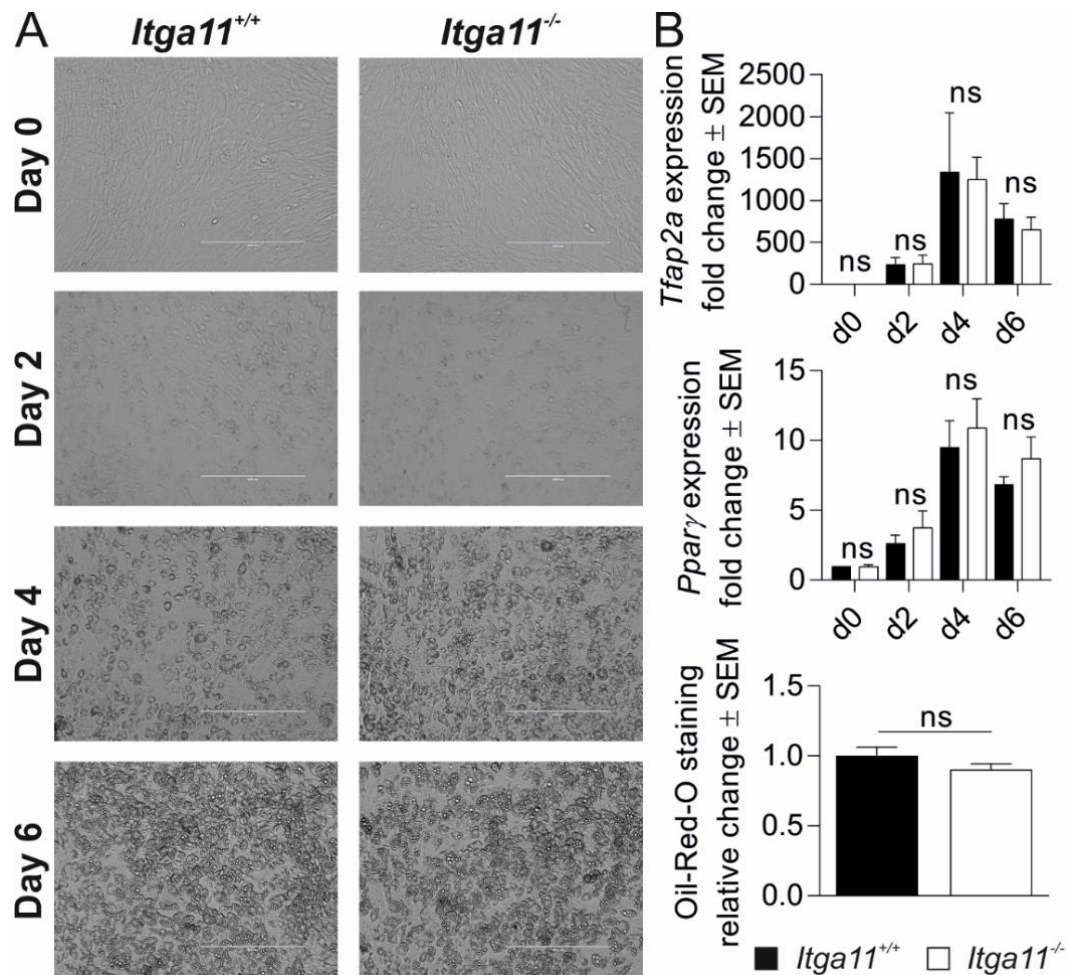

**Supplementary Figure 5. *In vitro* adipogenesis assay.** Mesenchymal progenitors were isolated from the inguinal white adipose tissue of the *Itga11<sup>+/+</sup>* and *Itga11<sup>-/-</sup>* mice and seeded on culture plates. The number of isolated cell batches was 3–4 per genotype. Adipogenic differentiation was induced with a cocktail consisting of 5 $\mu$ g/ml insulin, 1 $\mu$ M rosiglitazone, 0.5mM isobutylmethylxanthine, and 1 $\mu$ M dexamethasone and followed for six days. **(A)** Representative images of cell cultures at indicated time points. Scale, 400  $\mu$ m. **(B)** RT-qPCR for the adipogenesis markers Ap2 (*Tfap2a*) and PPAR $\gamma$  (*Pparg*) showed no differences in adipocyte differentiation between the *Itga11<sup>+/+</sup>* and *Itga11<sup>-/-</sup>* cells. The quantification of Oil-Red-O staining for the lipid content in adipocytes showed no differences between genotypes.

**Supplementary Table 4.** Histopathological analysis of mouse cSCC suspects.

|                                                                 | <i>Itga11</i> <sup>+/+</sup> | <i>Itga11</i> <sup>-/-</sup> |
|-----------------------------------------------------------------|------------------------------|------------------------------|
| Number of mice (>15 weeks in experiment)                        | 22                           | 18                           |
| Total number of macroscopic cSCC suspects                       | 14                           | 7                            |
| <b>Histological analysis and grading of cSCC suspects n (%)</b> |                              |                              |
| cSCC Grade 1                                                    | 3                            | 1                            |
| cSCC Grade 2                                                    | 3                            | 1                            |
| cSCC Grade 3                                                    | 3                            | 0                            |
| <b>Total cSCC</b>                                               | <b>9 (64%)</b>               | <b>2 (29%)</b>               |
| Benign papilloma                                                | 2                            | 2                            |
| Dysplastic papilloma                                            | 2                            | 3                            |
| Cystic papilloma                                                | 1                            | 0                            |
| <b>Total papilloma</b>                                          | <b>5 (36%)</b>               | <b>5 (71%)</b>               |
